# Supplementary material
Source: publisher site journal article supplement (https://www.degruyterbrill.com/publication/isbn/9783050049564/downloadAsset/9783050049564_Abbildungen.zip)
Supplement: Supplementary file 1 [file 3-05-004445_auftakt01.pdf › 3-05-004445_auftakt01.pdf]

# 1 Die Geschichte der Islamwissenschaft

---

---

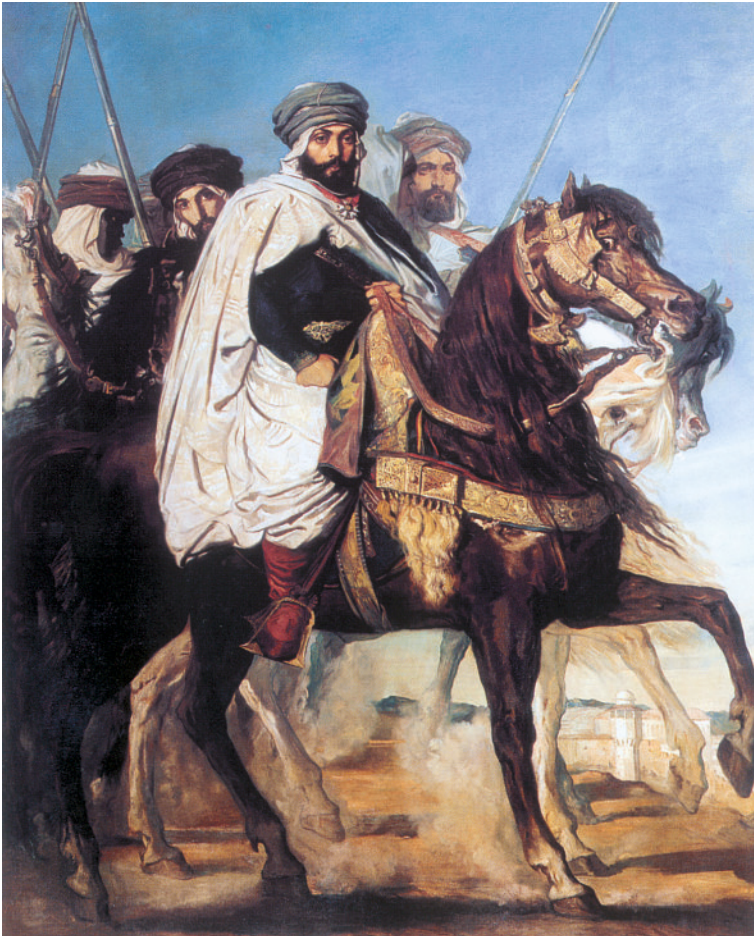

Abbildung 1: Théodore Chassériau: *Reiterbildnis des Ali Ben Bahmed, Kalifen von Constantine und Häuptling der Harakta, mit seinem Gefolge* (1845)
