# Supplementary material
Source: publisher site journal article supplement (https://www.degruyterbrill.com/publication/isbn/9783050049564/downloadAsset/9783050049564_Abbildungen.zip)
Supplement: Supplementary file 2 [file 3-05-004445_auftakt02.pdf › 3-05-004445_auftakt02.pdf]

## 2 Koran und Koranauslegung

---

---

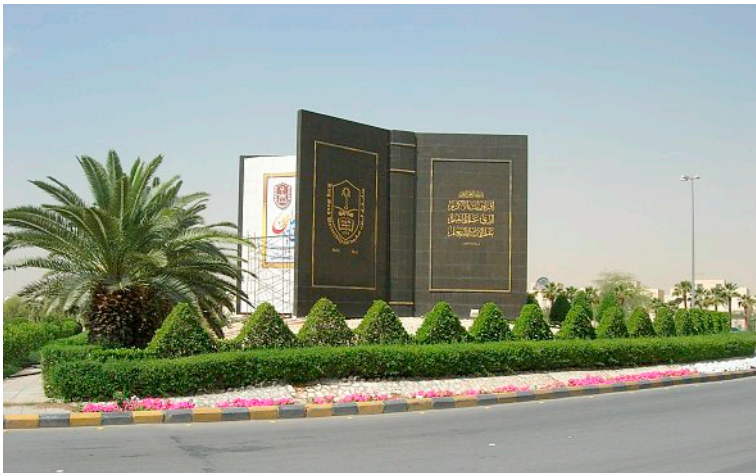

*Abbildung 2:* Aufgeschlagener Koran (1983), Skulptur am Eingang der König-Saud-Universität in Riad
