# Supplementary material
Source: publisher site journal article supplement (https://www.degruyterbrill.com/publication/isbn/9783050049564/downloadAsset/9783050049564_Abbildungen.zip)
Supplement: Supplementary file 3 [file 3-05-004445_auftakt03.pdf › 3-05-004445_auftakt03.pdf]

### 3 Authentizität oder Fälschung – Die Prophetentraditionen

---

---

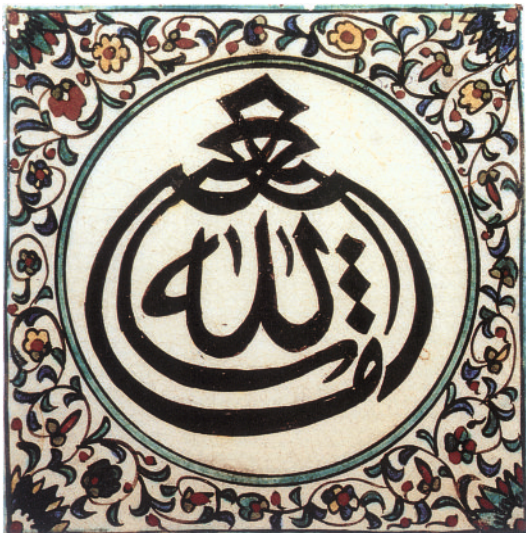

Abbildung 3: Türkische Zierkachel mit der Inschrift *Wie Gott will*, Keramik (19. Jh.)
