# Supplementary material
Source: publisher site journal article supplement (https://www.degruyterbrill.com/publication/isbn/9783050049564/downloadAsset/9783050049564_Abbildungen.zip)
Supplement: Supplementary file 4 [file 3-05-004445_auftakt04.pdf › 3-05-004445_auftakt04.pdf]

## 4 Das islamische Recht in Geschichte und Gegenwart

---

---

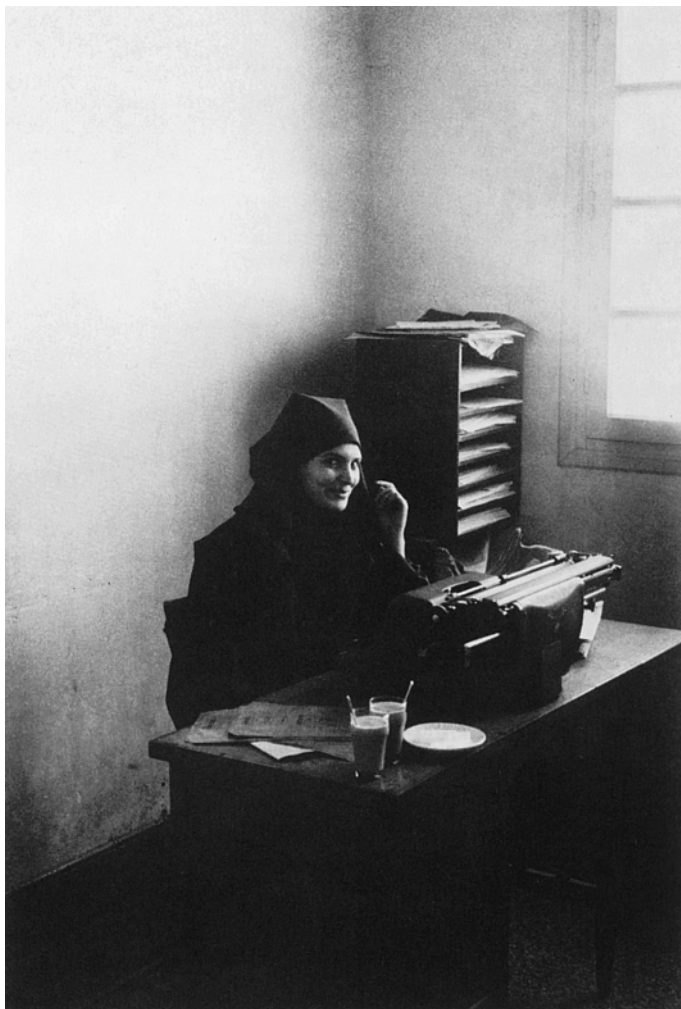

*Abbildung 5:* Marokkanische Gerichtssekretärin an der Schreibmaschine (1970er-Jahre)
