# Supplementary material
Source: publisher site journal article supplement (https://www.degruyterbrill.com/publication/isbn/9783050049564/downloadAsset/9783050049564_Abbildungen.zip)
Supplement: Supplementary file 8 [file 3-05-004445_auftakt08.pdf › 3-05-004445_auftakt08.pdf]

## 8 Das Bilderverbot – Übertretungen und kreative Alternativen

---

---

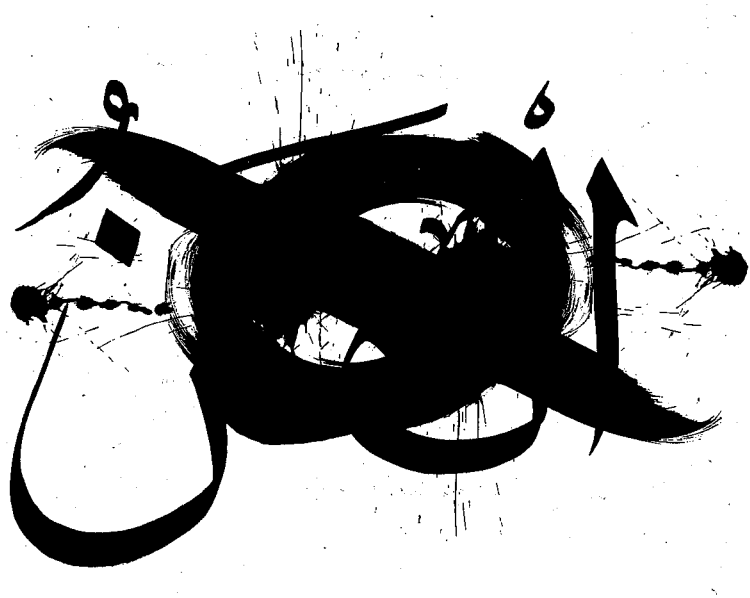

Abbildung 9: Übermalung des arabischen Wortes *al-fann* (arabisch für: die Kunst) (1995)
