# Supplementary material
Source: publisher site journal article supplement (https://www.degruyterbrill.com/publication/isbn/9783050049564/downloadAsset/9783050049564_Abbildungen.zip)
Supplement: Supplementary file 10 [file 3-05-004445_auftakt10.pdf › 3-05-004445_auftakt10.pdf]

## 10 Die Stellung der Frau im Islam

---

---

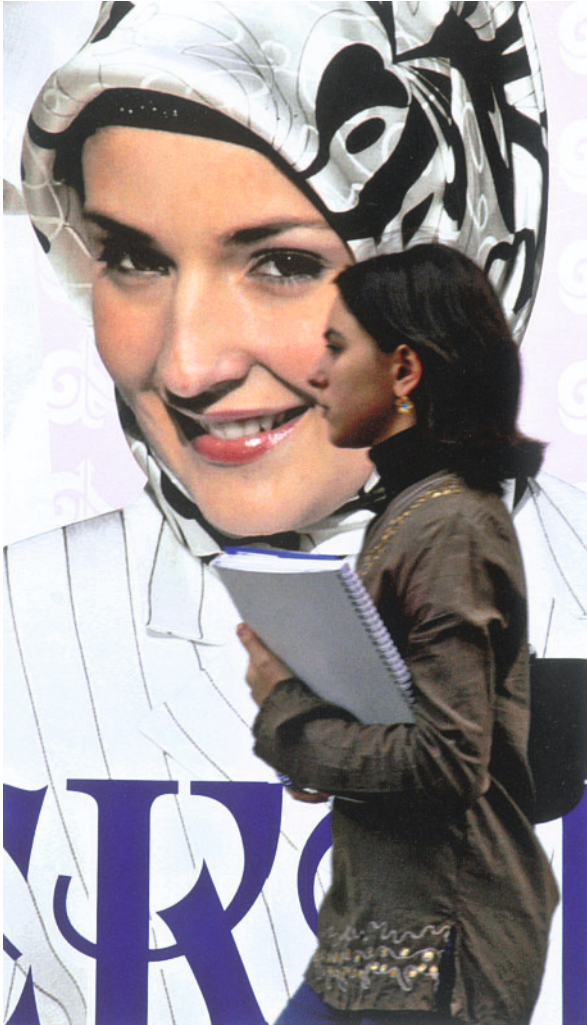

*Abbildung 11: Eine junge türkische Frau in Istanbul vor einem Werbeplakat für islamisch korrekte Kleidung (1999)*
