# Supplementary material
Source: publisher site journal article supplement (https://www.degruyterbrill.com/publication/isbn/9783050049564/downloadAsset/9783050049564_Abbildungen.zip)
Supplement: Supplementary file 14 [file 3-05-004445_auftakt14.pdf › 3-05-004445_auftakt14.pdf]

## 14 Christlich-islamischer Dialog

---

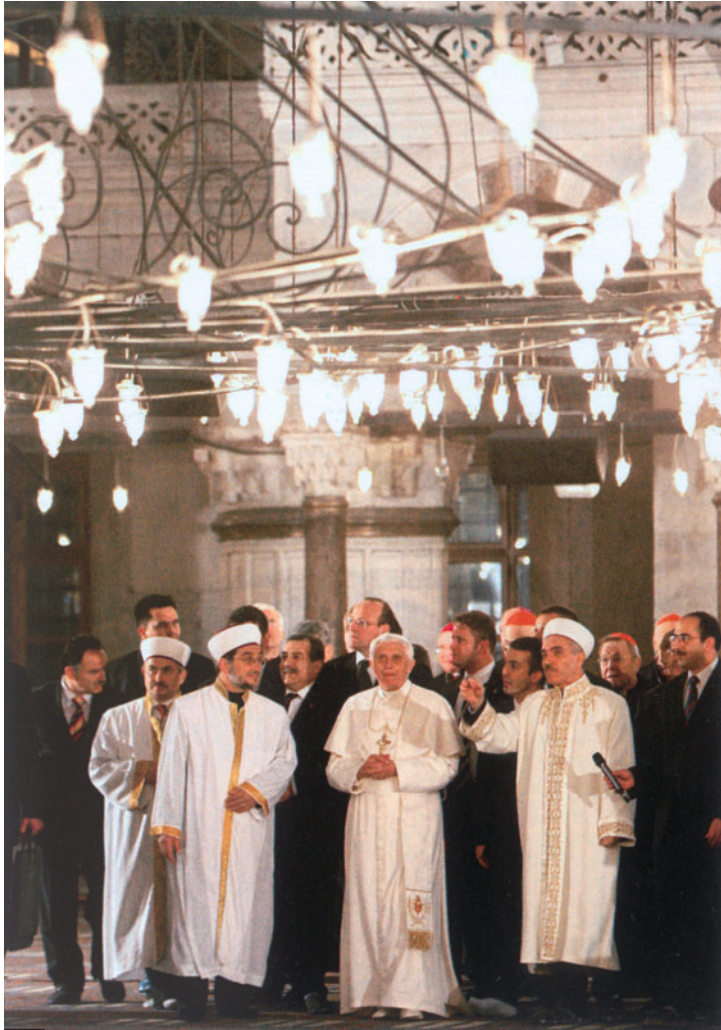

*Abbildung 15:* Papst Benedikt XVI. während seines Besuchs in Istanbul 2006 in der Blauen Moschee
