# Supplementary material
Source: publisher site journal article supplement (https://www.degruyterbrill.com/publication/isbn/9783050049564/downloadAsset/9783050049564_Abbildungen.zip)

## 5 Orthodoxie und Heterodoxien im Islam

---

---

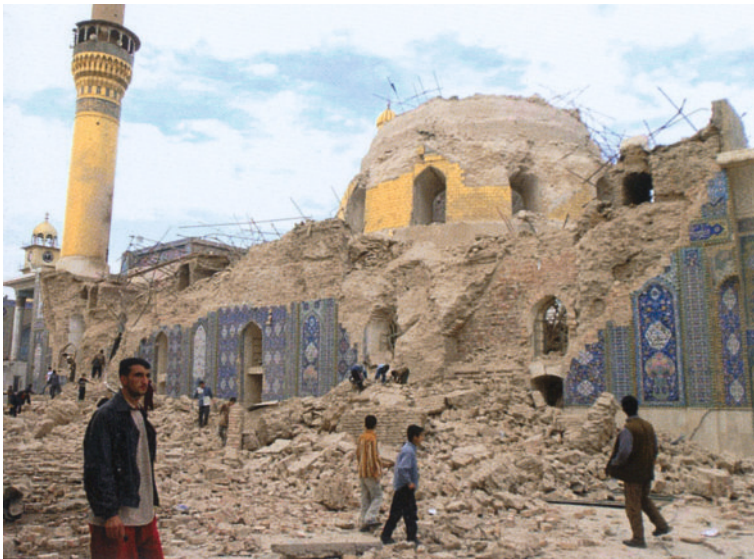

Abbildung 6: Die Goldene Moschee von Samarra (Irak) (2006)

Supplement: Supplementary file 5 [file 3-05-004445_auftakt05.pdf › 3-05-004445_auftakt05.pdf]

## 6 Gottesfreunde oder Nachahmer des Propheten

---

---

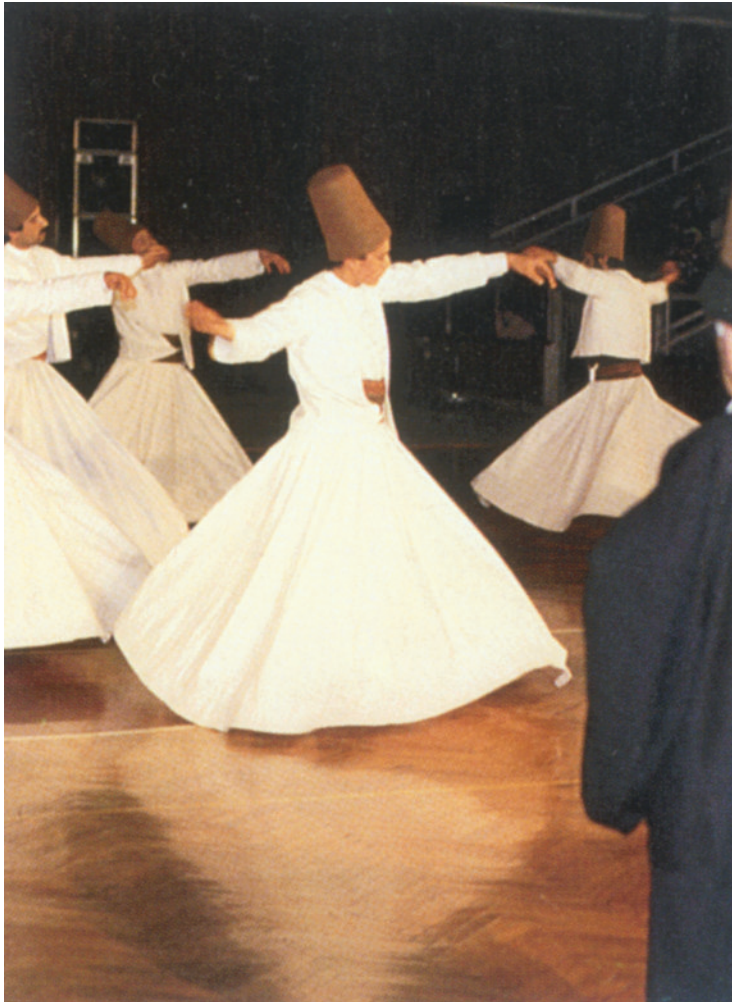

*Abbildung 7: Der Tanz der Derwische (1980er-Jahre)*

Supplement: Supplementary file 6 [file 3-05-004445_auftakt06.pdf › 3-05-004445_auftakt06.pdf]

## 7 Alltagskultur

---

---

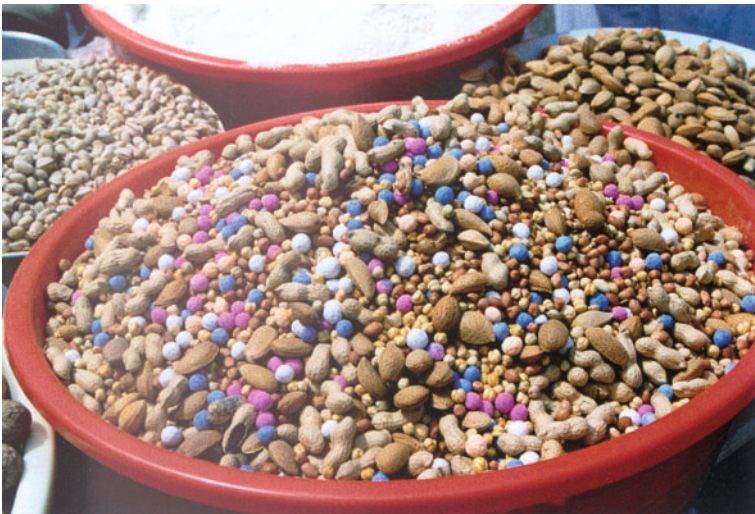

*Abbildung 8:* Schale mit Mandeln auf dem Markt in Maskat/Oman (1996)

Supplement: Supplementary file 7 [file 3-05-004445_auftakt07.pdf › 3-05-004445_auftakt07.pdf]

## 9 Islam in Deutschland

---

---

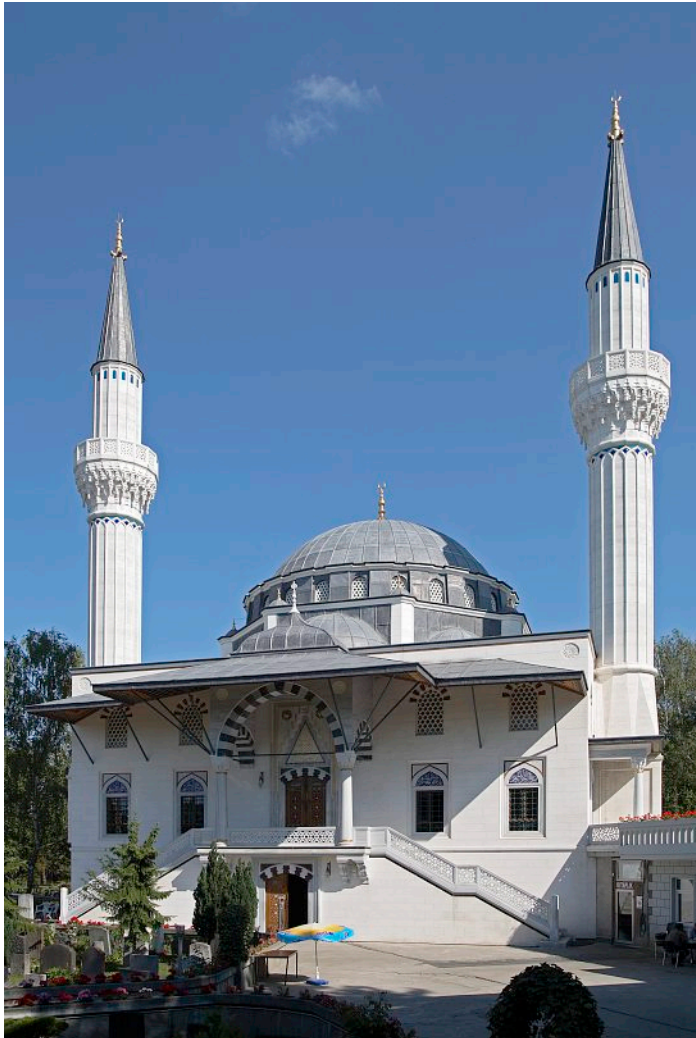

Abbildung 10: Die Şehitlik-Moschee in Berlin-Tempelhof (2006)

Supplement: Supplementary file 9 [file 3-05-004445_auftakt09.pdf › 3-05-004445_auftakt09.pdf]

## 11 Die islamische Stadt

---

---

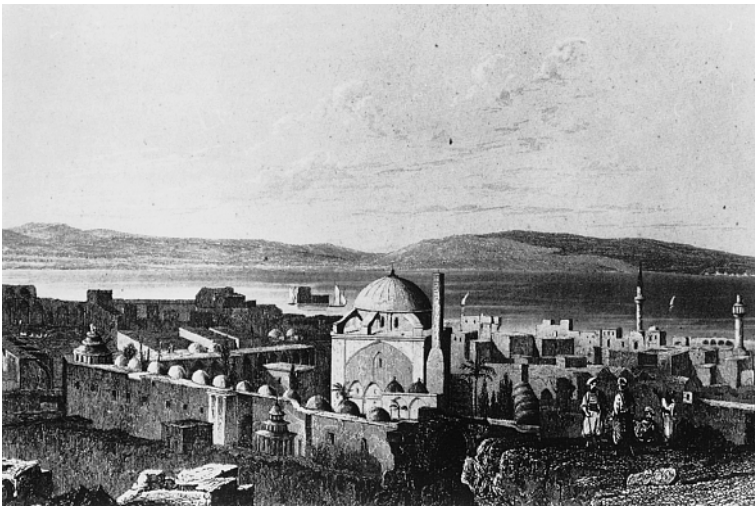

Abbildung 12: Blick von den Bergen auf die syrische Stadt Akka, Stahlstich (19. Jh.)

Supplement: Supplementary file 11 [file 3-05-004445_auftakt11.pdf › 3-05-004445_auftakt11.pdf]

## 12 Muslimbrüder und islamische Gesellschaft

---

---

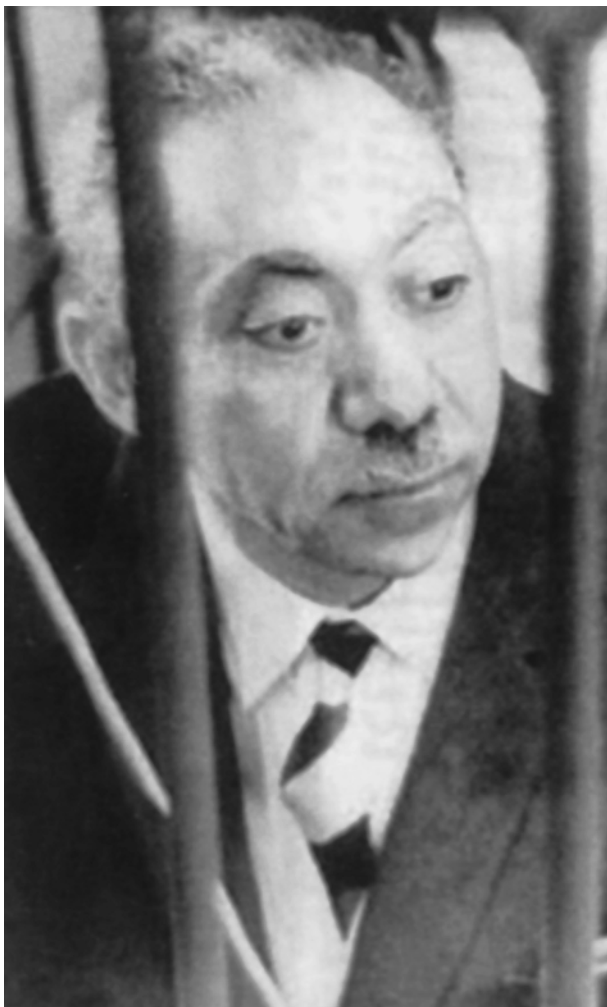

*Abbildung 13: Sayyid Qutb (1906–66) im Gefängnis (1966)*

Supplement: Supplementary file 12 [file 3-05-004445_auftakt12.pdf › 3-05-004445_auftakt12.pdf]

## 13 Der neue Jihâd

---

---

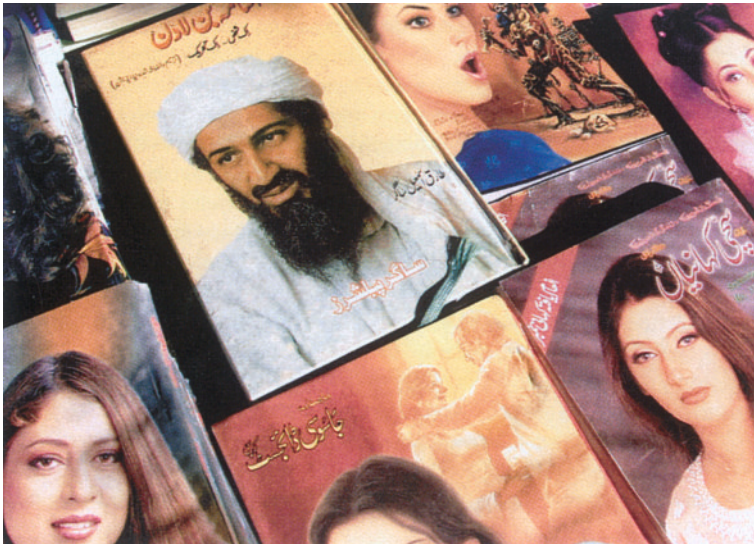

Abbildung 14: Usama bin Ladin-Poster zwischen Plakaten muslimischer Sängerinnen (2002)

Supplement: Supplementary file 13 [file 3-05-004445_auftakt13.pdf › 3-05-004445_auftakt13.pdf]
